# Supplementary material for: Insights into hydrogen bond donor promoted fixation of carbon dioxide with epoxides catalyzed by ionic liquids
Source: Royal Society of Chemistry journal article supplement (doi:10.1039/c4cp05464d), 2015-01-01
Supplement: c4cp05464d1.pdf [file c4cp05464d1.pdf]

## Supporting Information

### Insights into hydrogen bond donors promoted fixation of carbon dioxide with epoxides catalyzed by ionic liquids

Mengshuai Liu,<sup>a</sup> Kunqi Gao,<sup>a</sup> Lin Liang,<sup>c</sup> Fangxiao Wang,<sup>a</sup> Lei Shi,<sup>a</sup> Li Sheng<sup>\*a</sup> and Jianmin Sun<sup>\*b,a</sup>

<sup>a</sup> *The Academy of Fundamental and Interdisciplinary Science, Harbin Institute of Technology, Harbin 150080, PR China*

<sup>b</sup> *State Key Laboratory of Urban Water Resource and Environment, Harbin Institute of Technology, Harbin 150080, PR China*

<sup>c</sup> *School of Life Science and Technology, Harbin Institute of Technology, Harbin 150080, PR China*

## Table of Contents

|                                                                                   |            |
|-----------------------------------------------------------------------------------|------------|
| <b>1. Synthesis of task-specific ionic liquids.....</b>                           | <b>S2</b>  |
| <b>2. The cartesian coordinates of optimized geometries of stable points.....</b> | <b>S4</b>  |
| <b>3. Reference.....</b>                                                          | <b>S31</b> |

## 1. Synthesis of task-specific ionic liquids

**Synthesis of 1-butyylimidazole.** The synthesis procedure was carried out according to the literature.<sup>1</sup> NaH (17.6 mmol, 60 wt% in mineral oil) suspended in anhydrous THF (~20 mL) was added to 100 mL round bottom flask. Upon addition of imidazole (16.2 mmol) hydrogen gas was evolved. The reaction mixture was stirred at 40 °C until the gas evolution ceased. Then *n*-butyl bromide (16.2 mmol) was added and the reaction mixture was heated under reflux (70 °C) overnight. After cooling to room temperature, the solid precipitate was filtered off and washed with THF. The filtrate was reduced in volume under reduced pressure. MeOH was added and then washed three times with hexane. Finally the solvent in the MeOH phase was removed via rotary evaporation. The product was dried under vacuum overnight to give yellow-brownish oil. Yield: 89%.

**Synthesis of ionic liquid N-(2-hydroxyl-ethyl)-Pyridinium bromide.** A mixture of pyridine (14.2 mmol), 2-bromidethanol (11.8 mmol) and toluene (25 mL) was charged into 100 mL round bottom flask and stirred at 70 °C for 12 h. Then the mixture was cooled down to room temperature, and the solvent toluene was dumped. The resultant crude solid was washed repeatedly with ethyl acetate (3×30 mL) and dried at 50 °C for 12 h under vacuum. Yield: 95%. N-(2-hydroxyl-ethyl)-Pyridinium bromide (HEPyBr): <sup>1</sup>H NMR (400 MHz, D<sub>2</sub>O): δ = 8.89 (d, *J* = 5.5 Hz, 2H), 8.70–8.58 (m, 1H), 8.13 (t, *J* = 7.1 Hz, 2H), 4.78–4.73 (m, 2H), 4.16–4.06 (m, 2H); FT-IR (cm<sup>-1</sup>): 3289, 3054, 2876, 1636, 1491, 1177, 1072, 879, 774, 681.

The synthetic procedures for ionic liquids 1-(2-hydroxyl-ethyl)-3-methylimidazolium bromide (HEMimBr) and 1-(2-hydroxyl-ethyl)-3-buthylimidazolium bromide (HEBimBr) were similar to that of HEPyBr. The main differences were the corresponding 1-methylimidazole or 1-butyylimidazole were used to replace pyridine, respectively.

**Synthesis of ionic liquid N-(2-carboxyl-ethyl)-Pyridinium bromide.** A mixture of pyridine (14.2 mmol), bromoacetic (12.9 mmol) and toluene (25 mL) was charged into 100 mL round bottom flask and stirred at 70 °C for 12 h. Then the mixture was cooled down to room temperature, and the solvent toluene was dumped. The resultant

crude solid was washed repeatedly with ethyl acetate (3×30 mL) and dried at 50 °C for 12 h under vacuum. Yield: 96%. N-(2-carboxyl-ethyl)-Pyridinium bromide (CEPyBr): <sup>1</sup>H NMR (400 MHz, D<sub>2</sub>O): δ = 8.89–8.79 (m, 2H), 8.69–8.60 (m, 1H), 8.19–8.09 (m, 2H), 5.45 (s, 2H); FT-IR (cm<sup>-1</sup>): 3413, 3059, 2980, 1739, 1636, 1487, 1192, 778, 691.

The synthetic procedures for ionic liquids 1-(2-carboxyl-ethyl)-3-methylimidazolium bromide (CEMimBr) and 1-(2-carboxyl-ethyl)-3-butylimidazolium bromide (CEBimBr) were similar to that of CEPyBr. The main differences were the corresponding 1-methylimidazole or 1-butylimidazole were used to replace pyridine, respectively.

**2. The cartesian coordinates of optimized geometries of stable points calculated at M06-2X/6-31G (d, p) level of theory**

**Fig. 3 A**

|   |           |           |           |
|---|-----------|-----------|-----------|
| C | 1.131558  | 3.206686  | -0.292687 |
| C | -0.107418 | 3.477660  | 0.201079  |
| N | 1.238091  | 1.838490  | -0.388617 |
| C | 0.105093  | 1.281351  | 0.042802  |
| N | -0.723365 | 2.263992  | 0.410429  |
| H | 1.938592  | 3.860402  | -0.581074 |
| H | -0.596658 | 4.411994  | 0.423753  |
| H | -0.069226 | 0.196520  | 0.083883  |
| C | 2.425806  | 1.079074  | -0.825078 |
| C | 3.237030  | 0.577859  | 0.362596  |
| H | 3.001833  | 1.744965  | -1.473595 |
| H | 2.056965  | 0.220264  | -1.391736 |
| C | 4.327768  | -0.383554 | -0.102791 |
| H | 2.554469  | 0.024821  | 1.016872  |
| H | 3.661517  | 1.422541  | 0.921291  |
| C | 5.100275  | -0.968342 | 1.075163  |
| H | 5.013001  | 0.126277  | -0.792760 |
| H | 3.836042  | -1.194197 | -0.652423 |
| H | 5.568452  | -0.182200 | 1.676832  |
| H | 5.886941  | -1.646733 | 0.736461  |
| H | 4.423138  | -1.534936 | 1.720810  |
| C | -2.104350 | 2.039335  | 0.838578  |
| C | -3.052169 | 1.946698  | -0.365803 |
| H | -2.388651 | 2.843122  | 1.520244  |
| H | -2.125564 | 1.089362  | 1.372940  |
| O | -4.264326 | 1.370671  | 0.025279  |

|    |           |           |           |
|----|-----------|-----------|-----------|
| H  | -2.549023 | 1.365173  | -1.151278 |
| H  | -3.262777 | 2.945095  | -0.763180 |
| H  | -4.059980 | 0.430192  | 0.159050  |
| C  | -2.505795 | -2.246307 | 0.288133  |
| C  | -2.442380 | -1.698747 | -1.070616 |
| O  | -2.529125 | -0.826776 | 0.069658  |
| H  | -3.339093 | -1.712484 | -1.687940 |
| H  | -1.472504 | -1.685858 | -1.562222 |
| C  | -3.772379 | -2.831786 | 0.844166  |
| H  | -1.554013 | -2.580979 | 0.697728  |
| H  | -4.646191 | -2.415994 | 0.334029  |
| H  | -3.860773 | -2.621795 | 1.913541  |
| H  | -3.776298 | -3.916776 | 0.711843  |
| Br | 0.927031  | -1.918197 | -0.289100 |

**Fig. 3 TS<sub>A-B</sub>**

|   |           |           |           |
|---|-----------|-----------|-----------|
| C | 3.156778  | 2.233445  | 0.791851  |
| C | 4.136861  | 1.383044  | 0.388358  |
| N | 1.955931  | 1.613881  | 0.529980  |
| H | 3.207585  | 3.213196  | 1.238079  |
| N | 3.513154  | 0.261439  | -0.111979 |
| H | 5.210519  | 1.476066  | 0.410475  |
| C | 2.189767  | 0.415621  | -0.014742 |
| C | 4.216842  | -0.914753 | -0.651067 |
| H | 1.424485  | -0.320855 | -0.327456 |
| C | 0.615130  | 2.155168  | 0.824594  |
| C | -0.294666 | 2.148483  | -0.397004 |
| H | 0.767488  | 3.171611  | 1.195619  |
| H | 0.183280  | 1.563269  | 1.636396  |
| H | 0.109214  | 2.837940  | -1.148714 |

|    |           |           |           |
|----|-----------|-----------|-----------|
| C  | -1.727014 | 2.528214  | -0.019734 |
| H  | -0.288515 | 1.147623  | -0.845395 |
| H  | -1.716341 | 3.487845  | 0.514440  |
| H  | -2.142535 | 1.765984  | 0.651253  |
| C  | -2.636593 | 2.612588  | -1.240511 |
| H  | -2.255349 | 3.325273  | -1.980135 |
| H  | -3.641218 | 2.919936  | -0.943856 |
| H  | -2.744043 | 1.625915  | -1.698431 |
| C  | 3.262440  | -2.048067 | -1.003592 |
| H  | 4.908759  | -1.254217 | 0.123747  |
| H  | 4.785243  | -0.590962 | -1.527328 |
| H  | 2.536154  | -1.707130 | -1.754691 |
| O  | 2.630428  | -2.505373 | 0.153818  |
| H  | 3.869961  | -2.835615 | -1.470766 |
| H  | 1.662785  | -2.471950 | -0.024222 |
| C  | -1.433663 | -1.327655 | -0.761164 |
| H  | -1.459921 | -0.457784 | -1.396517 |
| Br | -3.703527 | -0.532412 | 0.106564  |
| H  | -1.863325 | -2.250695 | -1.122565 |
| C  | -0.944345 | -2.427574 | 1.471390  |
| H  | -1.888956 | -2.195602 | 1.969932  |
| H  | -0.139177 | -2.500454 | 2.208217  |
| H  | -1.040601 | -3.388803 | 0.959254  |
| H  | -0.517694 | -0.362323 | 0.931307  |
| O  | 0.259953  | -1.640624 | -0.573318 |
| C  | -0.666700 | -1.345702 | 0.461890  |

**Fig. 3 B**

|   |          |          |           |
|---|----------|----------|-----------|
| C | 2.583514 | 0.937424 | -1.939779 |
| C | 2.067547 | 2.188987 | -1.910025 |

|    |           |           |           |
|----|-----------|-----------|-----------|
| N  | 1.948954  | 0.240487  | -0.928100 |
| H  | 3.328994  | 0.492115  | -2.579768 |
| N  | 1.146321  | 2.207736  | -0.877404 |
| H  | 2.268962  | 3.052117  | -2.524693 |
| C  | 1.055437  | 1.006632  | -0.254787 |
| C  | 0.351365  | 3.387644  | -0.529935 |
| H  | 0.022570  | 0.394591  | 1.017790  |
| C  | 2.262203  | -1.132252 | -0.552840 |
| C  | 3.589232  | -1.238548 | 0.191555  |
| H  | 2.273885  | -1.749955 | -1.457697 |
| H  | 1.442306  | -1.475821 | 0.083455  |
| H  | 4.396336  | -0.846512 | -0.441034 |
| C  | 3.904017  | -2.676011 | 0.599069  |
| H  | 3.541361  | -0.595626 | 1.078472  |
| H  | 3.928529  | -3.310945 | -0.295386 |
| H  | 3.091012  | -3.058565 | 1.227817  |
| C  | 5.229739  | -2.787493 | 1.346780  |
| H  | 6.058949  | -2.434332 | 0.726192  |
| H  | 5.440676  | -3.820404 | 1.633093  |
| H  | 5.214508  | -2.182067 | 2.257806  |
| C  | 0.167405  | 3.602262  | 0.975725  |
| H  | -0.638283 | 3.313460  | -0.991195 |
| H  | 0.870185  | 4.247662  | -0.963293 |
| H  | 1.106699  | 3.351494  | 1.488147  |
| O  | -0.935902 | 2.928584  | 1.510595  |
| H  | -0.013818 | 4.672620  | 1.124829  |
| H  | -0.701531 | 2.014880  | 1.757969  |
| C  | -1.939238 | -1.355540 | 0.368465  |
| H  | -1.049210 | -1.562345 | -0.226335 |
| Br | -3.452281 | -1.627263 | -0.838522 |

|   |           |           |          |
|---|-----------|-----------|----------|
| H | -2.037549 | -2.088638 | 1.169268 |
| C | -3.080925 | 0.396099  | 1.812930 |
| H | -4.024035 | 0.255671  | 1.280942 |
| H | -3.006759 | 1.434356  | 2.143672 |
| H | -3.066310 | -0.255059 | 2.692448 |
| H | -1.870765 | 0.763937  | 0.069388 |
| O | -0.710292 | 0.175537  | 1.682057 |
| C | -1.897670 | 0.065971  | 0.921792 |

**Fig. 3 C**

|   |           |           |           |
|---|-----------|-----------|-----------|
| C | 0.598954  | 3.194609  | 0.744688  |
| C | 1.741480  | 3.300824  | 0.024533  |
| N | 0.044108  | 1.974777  | 0.407329  |
| H | 0.148967  | 3.861704  | 1.463203  |
| N | 1.830661  | 2.142082  | -0.728119 |
| H | 2.489500  | 4.076971  | -0.010838 |
| C | 0.785945  | 1.306753  | -0.508107 |
| C | 2.911870  | 1.858324  | -1.670229 |
| H | 0.200586  | -0.306564 | -0.937538 |
| C | -1.212627 | 1.448553  | 0.929051  |
| C | -2.403846 | 1.848369  | 0.067503  |
| H | -1.329319 | 1.806558  | 1.957742  |
| H | -1.107726 | 0.360654  | 0.964343  |
| H | -2.449995 | 2.942106  | -0.014293 |
| C | -3.718034 | 1.314545  | 0.633471  |
| H | -2.243283 | 1.456370  | -0.943753 |
| H | -3.898634 | 1.762825  | 1.618624  |
| H | -3.627972 | 0.234532  | 0.810951  |
| C | -4.900711 | 1.591913  | -0.289889 |
| H | -5.012814 | 2.666404  | -0.464939 |

|    |           |           |           |
|----|-----------|-----------|-----------|
| H  | -5.836556 | 1.222015  | 0.136207  |
| H  | -4.751834 | 1.107311  | -1.258902 |
| C  | 3.121441  | 0.359408  | -1.845629 |
| H  | 3.826995  | 2.304252  | -1.270761 |
| H  | 2.686500  | 2.324070  | -2.635869 |
| H  | 2.208667  | -0.093531 | -2.255309 |
| O  | 3.532439  | -0.264952 | -0.656222 |
| H  | 3.924768  | 0.215588  | -2.574045 |
| H  | 2.797568  | -0.247221 | -0.024220 |
| C  | 0.554220  | -2.556330 | 0.786827  |
| H  | 1.185022  | -3.397681 | 1.071990  |
| Br | 1.178901  | -1.049943 | 1.874919  |
| H  | -0.480566 | -2.722810 | 1.085105  |
| C  | 0.269275  | -3.487435 | -1.493772 |
| H  | 0.954260  | -4.314843 | -1.290695 |
| H  | 0.299566  | -3.255681 | -2.560126 |
| H  | -0.747407 | -3.801041 | -1.237073 |
| H  | 1.684831  | -1.962592 | -0.929220 |
| O  | -0.237558 | -1.208263 | -1.062289 |
| C  | 0.642896  | -2.237533 | -0.702118 |
| C  | -2.784406 | -1.549390 | -0.930808 |
| O  | -2.679282 | -2.271963 | -0.022103 |
| O  | -2.983701 | -0.837957 | -1.828179 |

**Fig. 3 TS<sub>C-D</sub>**

|   |           |          |           |
|---|-----------|----------|-----------|
| C | -0.700370 | 3.056411 | 0.597449  |
| C | 0.399069  | 3.523996 | -0.047202 |
| N | -0.758001 | 1.702551 | 0.340050  |
| H | -1.426984 | 3.558760 | 1.215580  |
| N | 0.975695  | 2.441091 | -0.681496 |

|    |           |           |           |
|----|-----------|-----------|-----------|
| H  | 0.819956  | 4.514691  | -0.104937 |
| C  | 0.263010  | 1.330763  | -0.442596 |
| C  | 2.180407  | 2.485495  | -1.516837 |
| H  | 0.501192  | 0.173997  | -0.778620 |
| C  | -1.762898 | 0.765593  | 0.842640  |
| C  | -3.119781 | 0.965937  | 0.180107  |
| H  | -1.821051 | 0.880709  | 1.929929  |
| H  | -1.365013 | -0.234121 | 0.648847  |
| H  | -3.535816 | 1.940786  | 0.467199  |
| C  | -4.091421 | -0.149484 | 0.561855  |
| H  | -2.978138 | 0.975652  | -0.905398 |
| H  | -4.217437 | -0.171701 | 1.651646  |
| H  | -3.652470 | -1.114749 | 0.280748  |
| C  | -5.448185 | 0.017243  | -0.115567 |
| H  | -5.913194 | 0.967493  | 0.164970  |
| H  | -6.133333 | -0.787052 | 0.161904  |
| H  | -5.338743 | 0.006435  | -1.203961 |
| C  | 2.965530  | 1.177753  | -1.443515 |
| H  | 2.801041  | 3.302114  | -1.140261 |
| H  | 1.887792  | 2.703874  | -2.548503 |
| H  | 2.346323  | 0.344483  | -1.800760 |
| O  | 3.471218  | 0.955180  | -0.151212 |
| H  | 3.819613  | 1.279697  | -2.120796 |
| H  | 2.814188  | 0.480948  | 0.378553  |
| C  | 1.160267  | -2.349886 | 0.842970  |
| H  | 1.856338  | -3.036184 | 1.325045  |
| Br | 1.210172  | -0.721136 | 1.954525  |
| H  | 0.134867  | -2.711534 | 0.913026  |
| C  | 1.597563  | -3.327399 | -1.390709 |
| H  | 2.348254  | -4.016279 | -0.990595 |

|   |           |           |           |
|---|-----------|-----------|-----------|
| H | 1.852783  | -3.092907 | -2.426508 |
| H | 0.620089  | -3.817434 | -1.381474 |
| H | 2.559767  | -1.590575 | -0.570594 |
| O | 0.648789  | -1.131980 | -1.184884 |
| C | 1.533289  | -2.013137 | -0.601518 |
| C | -1.447189 | -1.612157 | -1.504181 |
| O | -1.568765 | -2.585354 | -0.855992 |
| O | -1.680696 | -0.681546 | -2.177994 |

**Fig. 3 D**

|   |           |           |           |
|---|-----------|-----------|-----------|
| C | -0.081911 | -2.627918 | -1.214361 |
| C | 1.044848  | -2.834787 | -0.481351 |
| N | -0.934034 | -1.867031 | -0.442396 |
| H | -0.345212 | -2.937712 | -2.212337 |
| N | 0.854683  | -2.195773 | 0.724294  |
| H | 1.965133  | -3.346964 | -0.706102 |
| C | -0.341868 | -1.608632 | 0.721980  |
| C | 1.876163  | -2.003842 | 1.760228  |
| H | -0.700358 | -0.973201 | 1.526202  |
| C | -2.132504 | -1.170597 | -0.929207 |
| C | -3.173553 | -0.951194 | 0.156457  |
| H | -2.532978 | -1.771808 | -1.750927 |
| H | -1.782996 | -0.209389 | -1.320920 |
| H | -3.475350 | -1.916162 | 0.582496  |
| C | -4.388252 | -0.216866 | -0.408781 |
| H | -2.728232 | -0.332384 | 0.941825  |
| H | -4.819796 | -0.789174 | -1.240171 |
| H | -4.053791 | 0.741856  | -0.822681 |
| C | -5.450915 | 0.029067  | 0.658100  |
| H | -5.811662 | -0.915775 | 1.076151  |

|    |           |           |           |
|----|-----------|-----------|-----------|
| H  | -6.310284 | 0.564939  | 0.248142  |
| H  | -5.040664 | 0.623876  | 1.478825  |
| C  | 2.870572  | -0.932458 | 1.326977  |
| H  | 2.373584  | -2.965471 | 1.907989  |
| H  | 1.368030  | -1.686038 | 2.670877  |
| H  | 2.345641  | 0.024133  | 1.248464  |
| O  | 3.484026  | -1.313236 | 0.108941  |
| H  | 3.629491  | -0.845041 | 2.113604  |
| H  | 3.267190  | -0.634226 | -0.541058 |
| C  | 0.452732  | 2.271832  | -1.264545 |
| H  | 0.777773  | 2.853564  | -2.127023 |
| Br | 1.156888  | 0.463509  | -1.554897 |
| H  | -0.624032 | 2.139827  | -1.242130 |
| C  | 0.101602  | 4.097446  | 0.381505  |
| H  | 0.068421  | 4.813657  | -0.445389 |
| H  | 0.514034  | 4.598594  | 1.259452  |
| H  | -0.910120 | 3.754941  | 0.607371  |
| H  | 2.001848  | 3.219813  | -0.144196 |
| O  | 1.091477  | 2.006283  | 1.125367  |
| C  | 0.971498  | 2.891277  | 0.034020  |
| C  | 0.000016  | 1.199471  | 1.493710  |
| O  | -1.033663 | 1.260109  | 0.795180  |
| O  | 0.257927  | 0.465362  | 2.461917  |

**Fig. 3 TS<sub>D-E</sub>**

|   |           |           |           |
|---|-----------|-----------|-----------|
| C | -0.950071 | -2.796184 | -0.836773 |
| C | 0.145732  | -3.179385 | -0.130892 |
| N | -1.494807 | -1.711209 | -0.185283 |
| H | -1.374631 | -3.180764 | -1.749193 |
| N | 0.249014  | -2.316110 | 0.937851  |

|    |           |           |           |
|----|-----------|-----------|-----------|
| H  | 0.874881  | -3.953199 | -0.301461 |
| C  | -0.740362 | -1.426913 | 0.872854  |
| C  | 1.392437  | -2.218845 | 1.848544  |
| H  | -0.852363 | -0.600786 | 1.566210  |
| C  | -2.499436 | -0.802840 | -0.750349 |
| C  | -3.263332 | -0.033058 | 0.315705  |
| H  | -3.175993 | -1.414965 | -1.354308 |
| H  | -1.942898 | -0.121916 | -1.404995 |
| H  | -3.722124 | -0.734208 | 1.024211  |
| C  | -4.338985 | 0.846844  | -0.319892 |
| H  | -2.561496 | 0.604519  | 0.863974  |
| H  | -5.038144 | 0.223097  | -0.891005 |
| H  | -3.863534 | 1.523814  | -1.039629 |
| C  | -5.102509 | 1.657788  | 0.723007  |
| H  | -5.601264 | 0.999672  | 1.440993  |
| H  | -5.865066 | 2.287196  | 0.258213  |
| H  | -4.422413 | 2.306479  | 1.282257  |
| C  | 2.552809  | -1.505225 | 1.150837  |
| H  | 1.673771  | -3.236641 | 2.128123  |
| H  | 1.073556  | -1.656523 | 2.727984  |
| H  | 2.280084  | -0.455679 | 0.995898  |
| O  | 2.884743  | -2.144896 | -0.055334 |
| H  | 3.416273  | -1.534494 | 1.824644  |
| H  | 2.467215  | -1.628069 | -0.765287 |
| C  | 0.794923  | 2.388746  | -1.005025 |
| H  | 1.091176  | 2.346894  | -2.046803 |
| Br | 0.872297  | -0.055089 | -1.727406 |
| H  | -0.035947 | 3.063835  | -0.838334 |
| C  | 2.420353  | 3.930053  | 0.024726  |
| H  | 2.693856  | 4.323179  | -0.957835 |

|   |           |          |           |
|---|-----------|----------|-----------|
| H | 3.292679  | 3.987946 | 0.678368  |
| H | 1.624174  | 4.544156 | 0.452367  |
| H | 2.770336  | 1.850427 | -0.479730 |
| O | 1.679637  | 2.000713 | 1.229822  |
| C | 1.966933  | 2.471978 | -0.070907 |
| C | 0.470662  | 1.357237 | 1.398267  |
| O | -0.349974 | 1.461290 | 0.432939  |
| O | 0.322232  | 0.737168 | 2.449566  |

**Fig. 3 E**

|   |           |           |           |
|---|-----------|-----------|-----------|
| C | 0.488050  | -3.023701 | -0.863387 |
| C | 1.633813  | -3.016799 | -0.132685 |
| N | -0.410657 | -2.205297 | -0.221426 |
| H | 0.240692  | -3.523642 | -1.784791 |
| N | 1.411646  | -2.188973 | 0.944695  |
| H | 2.587355  | -3.491715 | -0.289764 |
| C | 0.185105  | -1.680132 | 0.846071  |
| C | 2.441893  | -1.704969 | 1.863658  |
| H | -0.248014 | -0.922900 | 1.487633  |
| C | -1.666063 | -1.683414 | -0.779069 |
| C | -2.838599 | -1.810505 | 0.183457  |
| H | -1.847579 | -2.236618 | -1.703879 |
| H | -1.458175 | -0.639983 | -1.042851 |
| H | -3.134281 | -2.862453 | 0.279939  |
| C | -4.013103 | -0.956926 | -0.288855 |
| H | -2.535377 | -1.456202 | 1.173314  |
| H | -4.312005 | -1.262260 | -1.299761 |
| H | -3.669692 | 0.081736  | -0.355062 |
| C | -5.205327 | -1.051135 | 0.657760  |
| H | -5.563122 | -2.082213 | 0.742327  |

|    |           |           |           |
|----|-----------|-----------|-----------|
| H  | -6.038183 | -0.434122 | 0.312154  |
| H  | -4.926289 | -0.709045 | 1.658841  |
| C  | 3.162535  | -0.504706 | 1.241022  |
| H  | 3.140316  | -2.528264 | 2.028017  |
| H  | 1.962634  | -1.449605 | 2.811905  |
| H  | 2.443763  | 0.317081  | 1.123463  |
| O  | 3.720992  | -0.867041 | 0.012733  |
| H  | 3.953061  | -0.190568 | 1.933515  |
| H  | 3.103388  | -0.529423 | -0.671780 |
| C  | -0.632573 | 3.133828  | -0.900212 |
| H  | -0.252724 | 2.761774  | -1.851827 |
| Br | 1.124254  | 0.370898  | -1.418397 |
| H  | -1.190477 | 4.066567  | -1.020375 |
| C  | 0.610533  | 4.599713  | 0.807751  |
| H  | 0.920269  | 5.339548  | 0.064449  |
| H  | 1.356604  | 4.578802  | 1.604466  |
| H  | -0.348653 | 4.910092  | 1.231872  |
| H  | 1.428761  | 2.879550  | -0.264209 |
| O  | 0.088371  | 2.272147  | 1.144448  |
| C  | 0.487449  | 3.239739  | 0.155229  |
| C  | -1.009873 | 1.626980  | 0.749510  |
| O  | -1.523143 | 2.149652  | -0.366211 |
| O  | -1.515111 | 0.714551  | 1.355520  |

**Fig. 3 F**

|   |           |           |           |
|---|-----------|-----------|-----------|
| C | 0.953335  | -2.226713 | 1.287245  |
| C | -0.352637 | -2.018964 | 0.972552  |
| N | 1.696909  | -1.962779 | 0.155207  |
| H | 1.415973  | -2.534095 | 2.210771  |
| N | -0.379338 | -1.628503 | -0.355046 |

|    |           |           |           |
|----|-----------|-----------|-----------|
| H  | -1.257989 | -2.068159 | 1.558196  |
| C  | 0.869557  | -1.590958 | -0.818847 |
| C  | -1.558257 | -1.191181 | -1.102797 |
| H  | 1.181135  | -1.203462 | -1.778940 |
| C  | 3.158844  | -1.823404 | 0.080294  |
| C  | 3.659461  | -0.785943 | 1.081507  |
| H  | 3.369265  | -1.466159 | -0.930072 |
| H  | 3.611303  | -2.807608 | 0.232210  |
| H  | 2.978448  | 0.069743  | 1.029047  |
| C  | 5.056416  | -0.302269 | 0.700941  |
| H  | 3.651133  | -1.196079 | 2.100343  |
| H  | 4.977640  | 0.153576  | -0.292904 |
| H  | 5.748277  | -1.151781 | 0.628921  |
| C  | 5.587261  | 0.727251  | 1.692915  |
| H  | 4.923418  | 1.596157  | 1.723659  |
| H  | 6.582910  | 1.076032  | 1.408694  |
| H  | 5.651647  | 0.311691  | 2.704013  |
| C  | -2.669518 | -2.238152 | -1.123517 |
| H  | -1.235845 | -0.943389 | -2.116017 |
| H  | -1.941169 | -0.292544 | -0.617885 |
| H  | -2.337004 | -3.132797 | -1.659378 |
| O  | -3.787005 | -1.728750 | -1.794838 |
| H  | -2.898275 | -2.529445 | -0.087113 |
| Br | 2.258563  | 1.088085  | -1.453060 |
| H  | -4.017539 | -0.867771 | -1.400994 |
| C  | -0.493317 | 1.643231  | 0.388638  |
| C  | -1.046611 | 2.879797  | 0.944620  |
| C  | -1.362030 | 4.054875  | 0.066155  |
| H  | -1.548305 | 3.719787  | -0.956662 |
| H  | -0.514741 | 4.744366  | 0.051413  |

|   |           |           |           |
|---|-----------|-----------|-----------|
| H | -2.241505 | 4.591827  | 0.430942  |
| O | -1.887790 | 1.725679  | 0.772743  |
| H | 0.112225  | 0.987815  | 1.010640  |
| H | -0.288708 | 1.581780  | -0.676690 |
| H | -0.845974 | 3.095525  | 1.992727  |
| C | -4.814943 | 0.662988  | 0.759215  |
| C | -4.387710 | -0.618291 | 1.455440  |
| H | -5.899346 | 0.651078  | 0.612094  |
| O | -4.202164 | 0.800789  | -0.510756 |
| H | -4.572903 | 1.529714  | 1.389662  |
| H | -4.682299 | -1.476657 | 0.839734  |
| H | -4.909815 | -0.696564 | 2.419830  |
| O | -2.984473 | -0.697577 | 1.628290  |
| H | -3.369517 | 1.281396  | -0.373311 |
| H | -2.622794 | 0.197292  | 1.733361  |

**Fig. 3 TS<sub>F-G</sub>**

|   |           |          |           |
|---|-----------|----------|-----------|
| C | -0.541867 | 2.390191 | 1.140745  |
| C | 0.765068  | 2.146106 | 0.849893  |
| N | -1.281496 | 2.029357 | 0.035399  |
| H | -1.005391 | 2.773317 | 2.034932  |
| N | 0.798384  | 1.649958 | -0.437220 |
| H | 1.654393  | 2.195023 | 1.456742  |
| C | -0.449860 | 1.579845 | -0.901051 |
| C | 1.966587  | 1.087898 | -1.129429 |
| H | -0.763017 | 1.134466 | -1.835900 |
| C | -2.747228 | 1.942278 | -0.044538 |
| C | -3.292515 | 0.985918 | 1.011660  |
| H | -2.972482 | 1.550506 | -1.038530 |
| H | -3.158465 | 2.950839 | 0.053235  |

|    |           |           |           |
|----|-----------|-----------|-----------|
| H  | -2.658074 | 0.093476  | 1.008316  |
| C  | -4.723166 | 0.565709  | 0.684577  |
| H  | -3.241898 | 1.445461  | 2.007186  |
| H  | -4.705085 | 0.062534  | -0.289089 |
| H  | -5.365551 | 1.450584  | 0.589575  |
| C  | -5.285575 | -0.382874 | 1.738242  |
| H  | -4.669581 | -1.284851 | 1.803363  |
| H  | -6.304330 | -0.690239 | 1.491668  |
| H  | -5.304464 | 0.086421  | 2.726987  |
| C  | 3.253621  | 1.885293  | -0.940522 |
| H  | 1.718711  | 1.019730  | -2.191374 |
| H  | 2.123685  | 0.089931  | -0.719248 |
| H  | 3.176352  | 2.867000  | -1.418459 |
| O  | 4.299140  | 1.187919  | -1.556725 |
| H  | 3.428858  | 2.034736  | 0.133623  |
| Br | -2.182871 | -1.145125 | -1.532800 |
| H  | 4.314759  | 0.281728  | -1.193045 |
| C  | 0.060959  | -1.738812 | -0.736407 |
| C  | 0.077976  | -1.479654 | 0.694742  |
| C  | -0.731000 | -2.414467 | 1.564513  |
| H  | -0.481366 | -3.447568 | 1.308633  |
| H  | -1.798924 | -2.255762 | 1.387192  |
| H  | -0.505632 | -2.253736 | 2.621478  |
| O  | 1.424952  | -1.825314 | 0.515351  |
| H  | 0.482765  | -1.024682 | -1.425294 |
| H  | -0.011204 | -2.767752 | -1.062716 |
| H  | -0.087195 | -0.425133 | 0.972281  |
| C  | 4.422129  | -1.492433 | 0.940366  |
| C  | 4.176653  | -0.177360 | 1.662589  |
| H  | 5.493481  | -1.716985 | 0.939915  |

|   |          |           |           |
|---|----------|-----------|-----------|
| O | 3.984589 | -1.430108 | -0.409222 |
| H | 3.898170 | -2.304370 | 1.459457  |
| H | 4.757668 | 0.612206  | 1.163317  |
| H | 4.547904 | -0.260771 | 2.694363  |
| O | 2.813314 | 0.195168  | 1.651871  |
| H | 3.052940 | -1.715351 | -0.402849 |
| H | 2.278588 | -0.583733 | 1.362519  |

**Fig. 3 G**

|   |           |           |           |
|---|-----------|-----------|-----------|
| C | -0.471095 | 1.898074  | 1.479689  |
| C | 0.795059  | 1.668296  | 1.034778  |
| N | -1.189866 | 2.423275  | 0.426867  |
| H | -0.923244 | 1.722351  | 2.442208  |
| N | 0.828486  | 2.065447  | -0.283958 |
| H | 1.649755  | 1.227296  | 1.533459  |
| C | -0.377766 | 2.507146  | -0.628013 |
| C | 1.926622  | 1.818650  | -1.237444 |
| H | -0.660979 | 2.855768  | -1.609270 |
| C | -2.643023 | 2.612877  | 0.407443  |
| C | -3.344164 | 1.281371  | 0.158728  |
| H | -2.874346 | 3.346021  | -0.370234 |
| H | -2.929170 | 3.045630  | 1.369958  |
| H | -3.037480 | 0.891676  | -0.820239 |
| C | -4.864755 | 1.392723  | 0.215752  |
| H | -2.992368 | 0.545218  | 0.891698  |
| H | -5.208003 | 2.116447  | -0.534293 |
| H | -5.165874 | 1.792055  | 1.192353  |
| C | -5.535230 | 0.041240  | -0.020454 |
| H | -5.242599 | -0.375057 | -0.988501 |
| H | -6.623506 | 0.132065  | 0.002750  |

|    |           |           |           |
|----|-----------|-----------|-----------|
| H  | -5.232574 | -0.680004 | 0.743869  |
| C  | 3.309509  | 1.999466  | -0.608086 |
| H  | 1.790234  | 2.496310  | -2.083595 |
| H  | 1.813312  | 0.777408  | -1.545055 |
| H  | 3.499060  | 3.060494  | -0.410284 |
| O  | 4.276439  | 1.529926  | -1.500051 |
| H  | 3.337806  | 1.461078  | 0.346789  |
| Br | -2.469325 | -2.086798 | -0.341928 |
| H  | 4.253100  | 0.549749  | -1.425734 |
| C  | -0.723704 | -1.280500 | -0.765951 |
| C  | 0.349888  | -1.548221 | 0.292357  |
| C  | 0.690200  | -3.031632 | 0.406947  |
| H  | 1.109458  | -3.380137 | -0.543695 |
| H  | -0.182144 | -3.641598 | 0.657954  |
| H  | 1.449245  | -3.161296 | 1.183340  |
| O  | 1.434651  | -0.782207 | -0.075459 |
| H  | -0.906662 | -0.205559 | -0.841897 |
| H  | -0.432983 | -1.681907 | -1.737581 |
| H  | -0.077395 | -1.215218 | 1.262818  |
| C  | 4.404231  | -1.635240 | 0.213884  |
| C  | 4.387904  | -0.642299 | 1.369664  |
| H  | 5.442197  | -1.884433 | -0.034117 |
| O  | 3.787597  | -1.118988 | -0.950246 |
| H  | 3.900686  | -2.562335 | 0.526376  |
| H  | 4.920516  | 0.265196  | 1.035326  |
| H  | 4.959109  | -1.061021 | 2.209949  |
| O  | 3.086842  | -0.328493 | 1.810687  |
| H  | 2.795770  | -1.136250 | -0.767637 |
| H  | 2.418841  | -0.576685 | 1.085164  |

**Fig. 3 H**

|    |           |           |           |
|----|-----------|-----------|-----------|
| C  | 0.313402  | -2.413255 | 0.878528  |
| C  | -0.898756 | -1.977341 | 0.432284  |
| N  | 1.147883  | -2.508058 | -0.214382 |
| H  | 0.653745  | -2.660532 | 1.871522  |
| N  | -0.783905 | -1.831646 | -0.931211 |
| H  | -1.808774 | -1.723002 | 0.965215  |
| C  | 0.456491  | -2.143955 | -1.294876 |
| C  | -1.789758 | -1.224036 | -1.816741 |
| H  | 0.850015  | -2.082630 | -2.298025 |
| C  | 2.603762  | -2.691552 | -0.167864 |
| C  | 3.303700  | -1.339029 | -0.064901 |
| H  | 2.903554  | -3.235374 | -1.068098 |
| H  | 2.819728  | -3.327966 | 0.694193  |
| H  | 3.055840  | -0.737934 | -0.948547 |
| C  | 4.819204  | -1.463464 | 0.059905  |
| H  | 2.900348  | -0.789258 | 0.795519  |
| H  | 5.213662  | -2.037163 | -0.788439 |
| H  | 5.067039  | -2.034501 | 0.963348  |
| C  | 5.484067  | -0.089714 | 0.111947  |
| H  | 5.270816  | 0.478704  | -0.797506 |
| H  | 6.567417  | -0.179027 | 0.219297  |
| H  | 5.099407  | 0.495151  | 0.952294  |
| C  | -3.214557 | -1.697469 | -1.515499 |
| H  | -1.512086 | -1.456657 | -2.847368 |
| H  | -1.728136 | -0.148717 | -1.638801 |
| H  | -3.334976 | -2.745629 | -1.810584 |
| O  | -4.106482 | -0.917410 | -2.252907 |
| H  | -3.393381 | -1.616445 | -0.435328 |
| Br | 2.456305  | 2.123712  | -0.600858 |

|   |           |           |           |
|---|-----------|-----------|-----------|
| H | -4.073723 | -0.032988 | -1.821210 |
| C | 0.763137  | 1.131943  | -0.582259 |
| C | -0.378205 | 1.862771  | 0.139570  |
| C | -0.903058 | 3.018195  | -0.711753 |
| H | -1.320154 | 2.635206  | -1.650124 |
| H | -0.107127 | 3.733302  | -0.941084 |
| H | -1.707483 | 3.535525  | -0.182927 |
| O | -1.331448 | 0.895881  | 0.403734  |
| H | 0.982110  | 0.205654  | -0.053856 |
| H | 0.515609  | 0.936765  | -1.629936 |
| H | 0.055739  | 2.293557  | 1.060656  |
| C | -4.365366 | 1.418805  | 0.428171  |
| C | -4.561225 | 0.124927  | 1.206115  |
| H | -5.341845 | 1.799177  | 0.105210  |
| O | -3.542217 | 1.228921  | -0.695334 |
| H | -3.920184 | 2.173355  | 1.097195  |
| H | -5.074102 | -0.600089 | 0.557733  |
| H | -5.206739 | 0.310125  | 2.076988  |
| O | -3.332412 | -0.442017 | 1.622760  |
| H | -2.577430 | 1.119881  | -0.306247 |
| H | -2.609566 | 0.206788  | 1.491901  |
| C | 0.069099  | 0.032588  | 2.709774  |
| O | -0.914589 | -0.389678 | 3.162493  |
| O | 1.105963  | 0.403834  | 2.326977  |

**Fig. 3 TS<sub>H-I</sub>**

|   |           |           |           |
|---|-----------|-----------|-----------|
| C | 0.280619  | -2.515395 | 0.537002  |
| C | -0.902933 | -1.988280 | 0.116001  |
| N | 1.166206  | -2.433089 | -0.516499 |
| H | 0.572255  | -2.924598 | 1.491161  |

|    |           |           |           |
|----|-----------|-----------|-----------|
| N  | -0.719508 | -1.605193 | -1.192321 |
| H  | -1.842502 | -1.821689 | 0.629574  |
| C  | 0.534440  | -1.871507 | -1.547659 |
| C  | -1.672033 | -0.801125 | -1.970704 |
| H  | 0.980149  | -1.638555 | -2.502700 |
| C  | 2.614160  | -2.661855 | -0.434573 |
| C  | 3.324066  | -1.401643 | 0.052031  |
| H  | 2.960744  | -2.962199 | -1.427341 |
| H  | 2.770568  | -3.505025 | 0.243311  |
| H  | 3.122346  | -0.581853 | -0.647864 |
| C  | 4.833244  | -1.582389 | 0.186911  |
| H  | 2.891502  | -1.095922 | 1.014030  |
| H  | 5.255844  | -1.857603 | -0.787433 |
| H  | 5.052043  | -2.413654 | 0.868753  |
| C  | 5.488397  | -0.300006 | 0.695929  |
| H  | 5.224654  | 0.547454  | 0.056669  |
| H  | 6.576360  | -0.391759 | 0.723177  |
| H  | 5.140396  | -0.064182 | 1.705537  |
| C  | -3.107622 | -1.332532 | -1.907827 |
| H  | -1.311286 | -0.754564 | -3.000835 |
| H  | -1.650389 | 0.194330  | -1.521636 |
| H  | -3.208523 | -2.232709 | -2.523073 |
| O  | -3.963707 | -0.350518 | -2.410863 |
| H  | -3.346760 | -1.594719 | -0.868563 |
| Br | 2.487996  | 2.212823  | -0.616479 |
| H  | -3.899612 | 0.386362  | -1.761557 |
| C  | 0.832459  | 1.172495  | -0.424113 |
| C  | -0.241779 | 1.853020  | 0.433733  |
| C  | -0.850751 | 3.046111  | -0.300721 |
| H  | -1.330068 | 2.722937  | -1.231571 |

|   |           |           |           |
|---|-----------|-----------|-----------|
| H | -0.083835 | 3.789854  | -0.536520 |
| H | -1.623135 | 3.509026  | 0.317742  |
| O | -1.163115 | 0.864214  | 0.750578  |
| H | 1.129813  | 0.240909  | 0.054184  |
| H | 0.482659  | 1.000329  | -1.445474 |
| H | 0.276339  | 2.233580  | 1.332112  |
| C | -4.316395 | 1.234229  | 0.718115  |
| C | -4.709627 | -0.198220 | 1.044263  |
| H | -5.211404 | 1.800944  | 0.430461  |
| O | -3.370805 | 1.280074  | -0.313752 |
| H | -3.907173 | 1.707939  | 1.627066  |
| H | -5.151045 | -0.662502 | 0.154218  |
| H | -5.461128 | -0.215513 | 1.847591  |
| O | -3.579616 | -0.978893 | 1.393602  |
| H | -2.431742 | 1.100999  | 0.129296  |
| H | -2.974920 | -0.439608 | 1.925292  |
| C | -0.283759 | -0.194864 | 2.576815  |
| O | -1.275148 | -0.685846 | 2.966484  |
| O | 0.834414  | 0.120084  | 2.437910  |

**Fig. 3 I**

|   |          |          |           |
|---|----------|----------|-----------|
| C | 0.961697 | 2.459810 | 1.237259  |
| C | 2.072792 | 1.814300 | 0.792700  |
| N | 0.263405 | 2.886421 | 0.128085  |
| H | 0.610642 | 2.652966 | 2.237671  |
| N | 2.037566 | 1.867249 | -0.583495 |
| H | 2.853463 | 1.294434 | 1.331832  |
| C | 0.925196 | 2.489518 | -0.953401 |
| C | 2.897814 | 1.115216 | -1.506455 |
| H | 0.588645 | 2.612006 | -1.970483 |

|    |           |           |           |
|----|-----------|-----------|-----------|
| C  | -1.087722 | 3.449662  | 0.140801  |
| C  | -2.124343 | 2.395923  | 0.518899  |
| H  | -1.280828 | 3.852565  | -0.857314 |
| H  | -1.093433 | 4.287897  | 0.844169  |
| H  | -2.040342 | 1.551187  | -0.174049 |
| C  | -3.539175 | 2.969641  | 0.528796  |
| H  | -1.878013 | 2.002211  | 1.513930  |
| H  | -3.808468 | 3.288657  | -0.485529 |
| H  | -3.570474 | 3.869561  | 1.156894  |
| C  | -4.552948 | 1.947757  | 1.036765  |
| H  | -4.520931 | 1.034877  | 0.435921  |
| H  | -5.569937 | 2.345506  | 1.002497  |
| H  | -4.335111 | 1.670954  | 2.073192  |
| C  | 4.341760  | 1.018103  | -1.013987 |
| H  | 2.863536  | 1.613364  | -2.478013 |
| H  | 2.457435  | 0.119184  | -1.583111 |
| H  | 4.798202  | 2.014118  | -0.998474 |
| O  | 5.071621  | 0.206961  | -1.890348 |
| H  | 4.344217  | 0.617733  | 0.006709  |
| Br | -4.215237 | -1.489980 | -0.913665 |
| H  | 4.844804  | -0.709356 | -1.643235 |
| C  | -2.331469 | -1.970268 | -0.709361 |
| C  | -1.830061 | -1.588605 | 0.679736  |
| C  | -2.439330 | -2.437312 | 1.779588  |
| H  | -2.188182 | -3.489750 | 1.619826  |
| H  | -3.525923 | -2.328419 | 1.781124  |
| H  | -2.044314 | -2.133806 | 2.750875  |
| O  | -0.424886 | -1.804767 | 0.716118  |
| H  | -1.796609 | -1.412571 | -1.472931 |
| H  | -2.266799 | -3.045283 | -0.877895 |

|   |           |           |           |
|---|-----------|-----------|-----------|
| H | -2.041925 | -0.526149 | 0.842322  |
| C | 4.295739  | -2.576157 | 0.521312  |
| C | 4.711277  | -1.510408 | 1.522831  |
| H | 5.140926  | -3.249834 | 0.345671  |
| O | 3.907015  | -2.030042 | -0.725821 |
| H | 3.470243  | -3.168626 | 0.938780  |
| H | 5.541930  | -0.932416 | 1.092499  |
| H | 5.085306  | -2.005064 | 2.430679  |
| O | 3.666162  | -0.618363 | 1.857256  |
| H | 2.968673  | -1.767798 | -0.627539 |
| H | 2.827238  | -0.931479 | 1.463637  |
| C | 0.361994  | -0.877815 | 0.058623  |
| O | 1.595481  | -1.102737 | 0.187610  |
| O | -0.188739 | 0.042790  | -0.562081 |

**Fig. 3 TS<sub>I,J</sub>**

|   |           |           |           |
|---|-----------|-----------|-----------|
| C | -0.715832 | -2.194526 | -1.150725 |
| C | 0.562812  | -1.815902 | -0.878130 |
| N | -1.461025 | -1.979884 | -0.009310 |
| H | -1.158791 | -2.583767 | -2.052575 |
| N | 0.572097  | -1.377367 | 0.429551  |
| H | 1.463402  | -1.767324 | -1.477054 |
| C | -0.657670 | -1.482442 | 0.930076  |
| C | 1.758530  | -0.904699 | 1.150334  |
| H | -0.982049 | -1.143013 | 1.902773  |
| C | -2.917580 | -2.121980 | 0.124132  |
| C | -3.662675 | -1.338959 | -0.952772 |
| H | -3.170129 | -1.720090 | 1.107419  |
| H | -3.163489 | -3.187440 | 0.097368  |
| H | -3.196181 | -0.353075 | -1.045485 |

|    |           |           |           |
|----|-----------|-----------|-----------|
| C  | -5.126895 | -1.143933 | -0.565385 |
| H  | -3.586215 | -1.850041 | -1.920627 |
| H  | -5.150017 | -0.570903 | 0.369318  |
| H  | -5.596879 | -2.115208 | -0.365456 |
| C  | -5.903732 | -0.395574 | -1.643620 |
| H  | -5.459899 | 0.588881  | -1.819261 |
| H  | -6.944983 | -0.246284 | -1.349736 |
| H  | -5.895965 | -0.943927 | -2.590700 |
| C  | 2.769296  | -2.033872 | 1.367487  |
| H  | 1.432929  | -0.493489 | 2.108658  |
| H  | 2.227295  | -0.126545 | 0.547307  |
| H  | 2.307172  | -2.836357 | 1.953343  |
| O  | 3.868989  | -1.560500 | 2.079535  |
| H  | 3.035765  | -2.444351 | 0.381229  |
| Br | -2.686522 | 1.085616  | 1.370469  |
| H  | 4.287323  | -0.841849 | 1.563154  |
| C  | -0.579009 | 1.954553  | 0.750392  |
| C  | -0.583181 | 1.491448  | -0.703661 |
| C  | -1.233828 | 2.527545  | -1.601634 |
| H  | -0.697406 | 3.476356  | -1.516646 |
| H  | -2.271086 | 2.670550  | -1.286719 |
| H  | -1.210231 | 2.196156  | -2.641121 |
| O  | 0.755169  | 1.210362  | -1.114901 |
| H  | -0.102500 | 1.364887  | 1.519874  |
| H  | -0.927190 | 2.937294  | 1.024605  |
| H  | -1.102452 | 0.536215  | -0.786729 |
| C  | 5.379520  | 0.240245  | -0.727833 |
| C  | 4.702778  | -0.959112 | -1.372512 |
| H  | 6.440049  | 0.014820  | -0.574430 |
| O  | 4.805013  | 0.554414  | 0.528592  |

|   |          |           |           |
|---|----------|-----------|-----------|
| H | 5.309233 | 1.109924  | -1.392541 |
| H | 4.844482 | -1.836503 | -0.727328 |
| H | 5.191453 | -1.170045 | -2.334979 |
| O | 3.311047 | -0.774579 | -1.543428 |
| H | 4.111435 | 1.217649  | 0.350507  |
| H | 3.111861 | 0.184152  | -1.569814 |
| C | 1.673208 | 2.014661  | -0.483719 |
| O | 2.855851 | 1.846501  | -0.822799 |
| O | 1.192603 | 2.775403  | 0.393373  |

**Fig. 3 J**

|   |           |           |           |
|---|-----------|-----------|-----------|
| C | -0.549157 | -2.102694 | -1.444098 |
| C | 0.707569  | -1.735828 | -1.076428 |
| N | -1.354018 | -1.98526  | -0.331408 |
| H | -0.938997 | -2.43484  | -2.392436 |
| N | 0.639946  | -1.392430 | 0.260789  |
| H | 1.642445  | -1.676808 | -1.616162 |
| C | -0.614999 | -1.551969 | 0.689548  |
| C | 1.776987  | -0.955057 | 1.074249  |
| H | -1.017845 | -1.254525 | 1.651694  |
| C | -2.817051 | -2.143721 | -0.30326  |
| C | -3.494074 | -1.124074 | -1.212943 |
| H | -3.122689 | -1.959554 | 0.728328  |
| H | -3.049323 | -3.174368 | -0.586762 |
| H | -3.036436 | -0.150184 | -1.010561 |
| C | -4.983864 | -1.017821 | -0.898188 |
| H | -3.333218 | -1.37952  | -2.268848 |
| H | -5.070480 | -0.706018 | 0.148921  |
| H | -5.464929 | -1.999155 | -0.999989 |
| C | -5.674592 | 0.003993  | -1.795332 |

|    |           |           |           |
|----|-----------|-----------|-----------|
| H  | -5.222476 | 0.991544  | -1.659850 |
| H  | -6.737387 | 0.088023  | -1.557084 |
| H  | -5.586186 | -0.267136 | -2.852496 |
| C  | 2.797502  | -2.075820 | 1.273839  |
| H  | 1.392571  | -0.592938 | 2.029763  |
| H  | 2.269955  | -0.136691 | 0.548685  |
| H  | 2.341081  | -2.905201 | 1.824028  |
| O  | 3.881532  | -1.610780 | 2.021674  |
| H  | 3.092686  | -2.450656 | 0.280953  |
| Br | -2.836321 | 0.546218  | 1.738598  |
| H  | 4.233346  | -0.807760 | 1.594057  |
| C  | -0.161463 | 2.424977  | 0.782691  |
| C  | -0.692758 | 1.858475  | -0.531041 |
| C  | -1.862506 | 2.595673  | -1.126976 |
| H  | -1.634273 | 3.657810  | -1.248088 |
| H  | -2.701347 | 2.466468  | -0.436080 |
| H  | -2.130765 | 2.173943  | -2.098310 |
| O  | 0.485276  | 1.944882  | -1.387552 |
| H  | -0.551363 | 1.888043  | 1.646092  |
| H  | -0.342485 | 3.499955  | 0.876976  |
| H  | -0.928654 | 0.796063  | -0.417694 |
| C  | 5.419309  | 0.447767  | -0.546950 |
| C  | 4.916639  | -0.813705 | -1.228663 |
| H  | 6.470984  | 0.317341  | -0.273139 |
| O  | 4.688949  | 0.728527  | 0.634253  |
| H  | 5.355303  | 1.298462  | -1.238187 |
| H  | 5.027329  | -1.662603 | -0.544094 |
| H  | 5.526241  | -1.013411 | -2.121229 |
| O  | 3.540903  | -0.730965 | -1.557769 |
| H  | 3.960279  | 1.318785  | 0.384470  |

|   |          |          |           |
|---|----------|----------|-----------|
| H | 3.330648 | 0.181337 | -1.811494 |
| C | 1.563777 | 2.015648 | -0.620054 |
| O | 2.703989 | 1.885057 | -1.016489 |
| O | 1.262824 | 2.216373 | 0.661329  |

### 3. Reference

- 1 M. Yang, K. Stappert and A. V. Mudring, *J. Mater. Chem. C*, 2014, **2**, 458–473.
